# Supplementary material
Source: PubMed Central journal article supplement (PMC3100952)
Supplement: 1018495108_pnas.201018495SI.pdf [file 1018495108_pnas.201018495SI.pdf]

# Supporting Information

Ullrich-Lüter et al. 10.1073/pnas.1018495108

## SI Materials and Methods

**Animal Supply and Culture.** *Strongylocentrotus purpuratus*. Adult animals were collected from a location at 25 to 30-m depth in the San Diego, CA bay, maintained for a week in an open tank system at the Kerchoff Marine Laboratory, Corona Del Mar, CA, shipped to Naples, Italy, by Global Animal Transport, and subsequently housed in circulating seawater aquaria at the Stazione Zoologica Anton Dohrn, Naples, Italy, 15 °C, under a day/night light cycle. Larvae were cultured according to standard procedures (1) at 15 °C, in filtered seawater diluted 9:1 with deionized water, and fed with *Isochrysis galbana* maintained at 3,000 cells/mL.

**Asterias rubens.** Spawning was induced by intracoelomic injection with 2 mL of 0.1 mM 1-methyladenine. Fertilized eggs were rinsed in filtered seawater and at the two-cell stage were transferred to 5 L aquaria at a density of 10 embryos per milliliter. Cultures were maintained at constant temperature (12 °C), a salinity of 32‰ and alkalinity of  $2.12 \pm 0.02$  mM. After day 2, larvae were fed daily with the red alga *Rhodomonas lens* at a concentration of 50 to 200 µg of carbon per liter.

**Phototaxis Experiments.** Adult animals were dark-adapted for 10 min in the center of a 10 × 50-cm glass tank, filled with seawater to a depth of 6 to 7 cm. The tank was externally obscured with black adhesive foil except for a window of 1 × 5 cm, located at the center of each short side of the tank. Phototaxis experiments were performed using a goose neck (1-cm diameter) optic fiber light source (color temperature 3,350 K, CRI 100Ra8) (see white spectrum 1 in Fig S1D) placed 1 cm next to the shorter side of the tank at the center of the transparent window. Twenty adult *S. purpuratus* were included in the test series. Controls included 20 adult animals kept under dark adaptation conditions for a period of 30 min. These animals did not display any substantial movements within the control period. Animal behavior in light conditions was recorded using a tripod fixed digital camera and the speed at which they moved away from the directional light was calculated by measuring length spanning from start to end position of the animal's body center over each period. Experiments on juveniles used the same apparatus except that tank dimensions were 2.5 × 20 cm. About 50 specimens of *S. purpuratus* and *Paracentrotus lividus*, aged from 0 to 1 mo after metamorphosis, were tested individually and subsequently fixed for immunostaining.

The same 10 × 50-cm tank, equipped with an LED-based light system of variable intensity (M2M Engineering), was used to measure *S. purpuratus* adult phototaxis at different wavelengths in comparison with white light (for the set up used, see Fig. S1A and B, and white spectrum 2 in Fig. S1D). A total of 15 to 20 animals (6- to 8-cm diameter), randomly picked in groups of 10 and adapted for 1 h in a 20 × 50-cm tank (in seawater communication with the 10 × 50-cm tank), at 15 °C, in dark conditions, were used for the whole experiment. For each measurement, an animal was taken from the 20 × 50-cm tank, placed in the center of the 10 × 50-cm tank, blocked by a dark box (9 × 9 cm) (Fig S1A), and allowed to rest in the dark box for 1 min. After this resting period, light was turned on, the box was removed, and the animal was observed for 2 min. The distance span by the animal from start to end position over the 2-min period was measured using a ruler placed at the bottom of the tank (Fig. S1B). Light intensity in seawater at the different sea urchin positions was measured for each monochromatic and white light and was found to be ranging between 0.2 and 1.0 µwatt/cm<sup>2</sup> throughout the experiment.

**In Situ Hybridization.** Fragments of *Sp-opsin4* and *Sp-Pax6* were amplified from genomic DNA by PCR using specific primers (Op4IL: ATGCCATCTTCTGGTCCATC/Op4IR: AGCAGAA-GCAGAAGCAGGAG; SpPax6F: AGAGCCGAAGAAGG-AGAAG/SpPax6R: CGGACTCTACCCGACAGAAG). PCR products were purified and cloned into pCRII-TOPO vector (Invitrogen) according to the manufacturer's instructions, and the identity of the inserts was determined by sequencing. Whole-mount in situ hybridizations (WMISH) were performed as described by Arendt et al. (2). For fluorescent WMISH, the staining protocol outlined by Cole et al. (3) was followed and signal was developed with Cy3-fluorophore-conjugated tyramide (Perkin-Elmer). Accuracy of the WMISH results was confirmed by control experiments using sense probes. Both antisense- and sense-digoxigenin-labeled RNA probes were obtained using a DIG-RNA labeling kit (Roche), following the manufacturer's instructions by using 1 µg of linearized plasmids. RNA probes were purified using the Mini Quick Spin RNA Columns (Roche). After staining, samples were mounted in glycerol and analyzed on a Zeiss Axio Imager M1 microscope operating in differential interference contrast mode or a Zeiss 510Meta or a Leica SP5 confocal microscope.

**Antibody Production and Purification.** Purified polyclonal antibodies against the c-terminal tail of Sp-Opsin4 were developed upon request by PRIMM ([www.primm.it](http://www.primm.it)). Recombinant proteins were produced as His-Tag fusions.

**Immunohistochemistry.** Tissues and specimens were fixed in 4% paraformaldehyde in filtered seawater at room temperature for 15 min, then postfixed with ice-cold methanol for 1 min. Fixed specimens were rinsed in PBS pH 7.4 and then blocked 4% BSA containing 0.1% Tween-20 at room temperature. Anti-synaptotagmin B (1E11) (4), anti-acetylated tubulin (Sigma), and anti-Sp-Opsin-4 were diluted 1:200, 1:250, or 1:50, respectively, in PBS. After an overnight incubation (at room temperature), embryos were rinsed in PBS and then incubated in a 1:1,000 dilution of Alexa488 conjugated anti-rabbit IgG and Alexa568 conjugated anti-mouse IgG (Molecular Probes) for 2 h at room temperature. After several washes in PBS, specimens were examined using a Leica SP 5 or Zeiss 510Meta confocal laser-scanning microscope. Pictures shown were produced by recording confocal image stacks and projecting them in the z axis using MacBiophotonics ImageJ or the Leica SP 5 software. Colocalization of Sp-Opsin4 protein and *Sp-opsin4* RNA was performed with the colocalization tool of MacBiophotonics ImageJ. Projection of Sp-Opsin4-positive photoreceptor cells (PRCs) onto scanning electron microscopy (SEM) pictures was obtained using Photoshop CS2 clipping function. Decalcification of dissected adult tissues including parts of the test was obtained by treatment with 2% ascorbic acid/0.15 M NaCl for 3 d on a slow rotator at room temperature. Immunohistochemistry coupled to WMISH was similarly performed by incubating anti-acetylated tubulin and anti-Sp-Opsin-4 antibodies together with the anti-digoxigenin-11-UTP antibody. After WMISH staining, specimens were rinsed in PBS and then incubated in a 1:1,000 dilution of Alexa488 conjugated anti-rabbit IgG and Alexa633 conjugated anti-mouse IgG (Molecular Probes) and washed as described previously.

**Scanning Electron Microscopy.** Specimens were fixed in 2.5% glutaraldehyde in PBS and rinsed in PBS several times. After postfixation in 1% Os<sub>4</sub>O in PBS, specimens were dehydrated in a graded acetone series, transferred to 100% Ethanol, and dried

using a critical point dryer. After mounting on stubs, they were sputter coated with gold and viewed on a REM Quanta SEM.

**μCT Scanning.** A small (approximately 3 × 5 mm) part of the skeleton of an adult specimen of *S. purpuratus* was scanned using a Phoenix nanotom μCT scanner. The system uses a tungsten X-ray source and a CCD camera with a 2,304 × 2,304-pixel matrix. Scanning was accomplished using 1,440 images at 360° rotation, resulting in a voxel size of 5.5 μm. Scanning parameters were: 150 kV, 180 μA, 750-ms exposure time, and three averages. Image reconstruction was performed using the software provided with the μCT system. Three-dimensional visualization was accomplished using VGStudioMAX 2.0.

**Transmission Electron Microscopy, Including Immunogold Labeling.** Specimens were fixed in 2.5% Glutaraldehyde in PBS and rinsed in PBS several times. After postfixation in 1% Os<sub>4</sub>O in PBS, specimens were dehydrated in a graded acetone series and embedded in plastic resin (Araldite M, Fluka; art. no.: 10951) for 48 h at 60 °C. Serial sections were cut using a diamond knife and a Reichert ultramicrotome S and stained with uranyl acetate and lead citrate (Phoenix ultrastain, Staining Technologies). Exami-

nation was carried out on a Phillips CM Biotwin transmission electron microscope (TEM). Three-dimensional reconstruction of PRCs and surrounding tissues was performed using Photoshop CS2 for alignment of the TEM serial section photographs and Amira 2.0 for subsequent 3D surface rendering.

For immunogold labeling on ultrasections, *S. purpuratus* tube feet were fixed in 0.5% glutaraldehyde/4% PFA in PBS, pH7.4 initially and then decalcified in 1% ascorbic acid/0.15 M NaCl on ice. Dehydration and embedding in LR White medium followed the protocol of Agar Scientific Limited; polymerization was carried out in fully filled small Eppendorf tubes within an UV-incubator for 48 h at room temperature. Obtained sections (see above) were mounted on nickel grids and then processed following the protocol of Tan et al. (5), including treatment with ammonium chloride and blocking with 5% normal goat serum/0.1% BSA. Primary antibody incubation (anti-Sp-Opsin4) 1:50 in PBS overnight was followed by incubation with anti-rabbit IgG Gold (Sigma Aldrich; Cat. No.: G7402) for 2.5 h, at room temperature. Gold enhancement was performed using the Nanoprobes Goldenhance<sup>TM</sup>-EM kit, following the manufacturers instructions, except that no postfixation step was applied.

1. Leahy PS (1986) Laboratory culture of *Strongylocentrotus purpuratus* adults, embryos, and larvae. *Methods Cell Biol* 27:1–13.
2. Arendt D, Tessmar-Raible K, Snyman H, Dorresteyn AW, Wittbrodt J (2004) Ciliary photoreceptors with a vertebrate-type opsin in an invertebrate brain. *Science* 306: 869–871.
3. Cole AG, Rizzo F, Martinez P, Fernandez-Serra M, Arnone MI (2009) Two Parahox genes, *SpLox* and *SpCdx*, interact to partition the posterior endoderm in the formation of a functional gut. *Development* 136:541–549.
4. Nakajima Y, Kaneko H, Murray G, Burke RD (2004) Divergent patterns of neural development in larval echinoids and asteroids. *Evol Dev* 6:95–104.
5. Tan E, et al. (2001) The relationship between opsin overexpression and photoreceptor degeneration. *Invest Ophthalmol Vis Sci* 42:589–600.
